# Supplementary material for: Absence of the proteoglycan decorin reduces glucose tolerance in overfed male mice
Source: PubMed Central journal article supplement (PMC6420637; doi:10.1038/s41598-018-37501-x), 2019-03-15
Supplement: 41598_2018_37501_MOESM1_ESM.pdf [file 41598_2018_37501_MOESM1_ESM.pdf]

## **Absence of the proteoglycan decorin reduces glucose tolerance in overfed male mice**

**Jessica Svärd<sup>1,2</sup>, Therese H Røst<sup>1,2,\*</sup>, Camilla E N Sommervoll<sup>1,2,\*</sup>, Christine Haugen<sup>1,2</sup>, Oddrun A Gudbrandsen<sup>3</sup>, Anne E Mellgren<sup>3,4</sup>, Eyvind Rødahl<sup>3,4</sup>, Johan Fernø<sup>1,2</sup>, Simon N Dankel<sup>1,2</sup>, Jørn V Sagen<sup>1,2</sup> and Gunnar Mellgren<sup>1,2‡</sup>**

<sup>1</sup> KG Jebsen Center for Diabetes Research, Department of Clinical Science, University of Bergen, N-5020 Bergen, Norway,

<sup>2</sup> Hormone Laboratory, Haukeland University Hospital, N-5021 Bergen, Norway,

<sup>3</sup> Department of Clinical Medicine, University of Bergen, Norway,

<sup>4</sup> Department of Ophthalmology, Haukeland University Hospital, Bergen, Norway

‡ Corresponding author: [gunnar.mellgren@uib.no](mailto:gunnar.mellgren@uib.no), \*These authors contributed equally.

# Suppl. Fig. 1

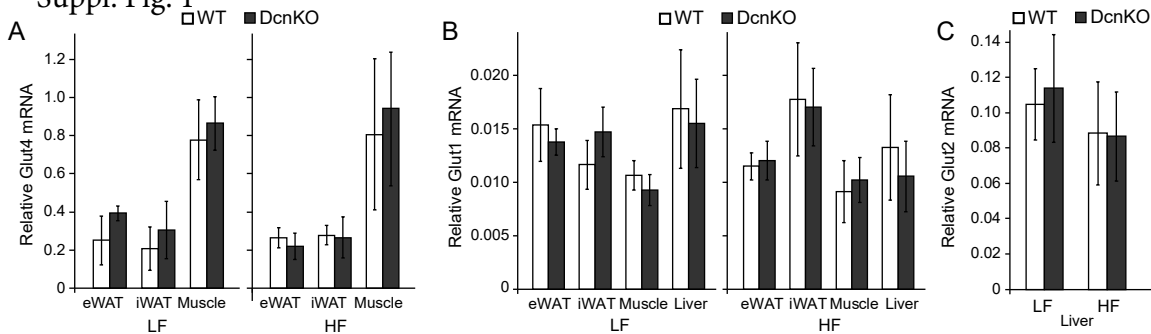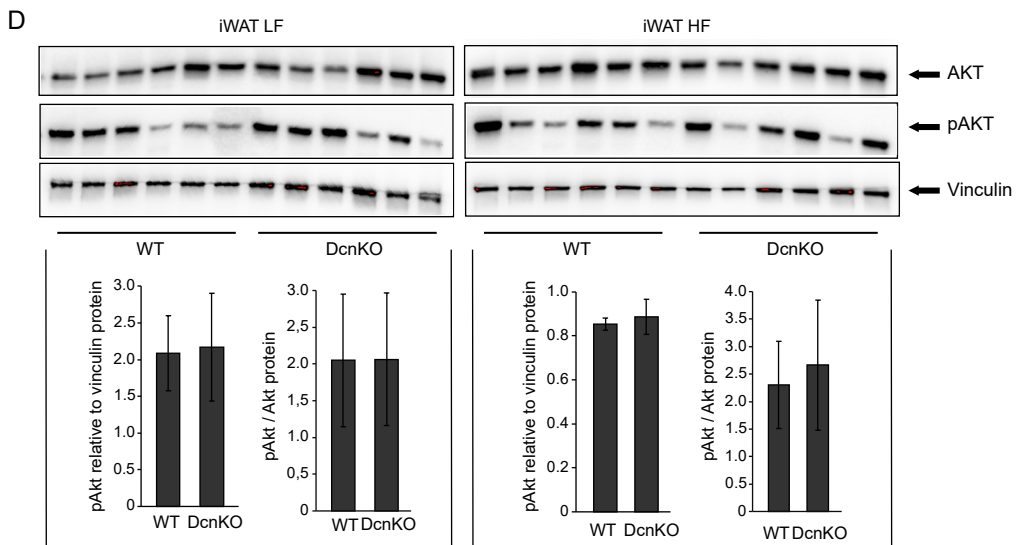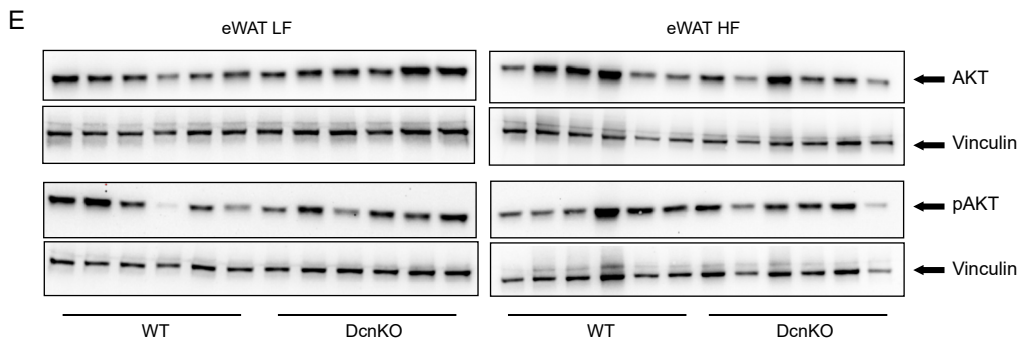

Suppl. Fig. 2

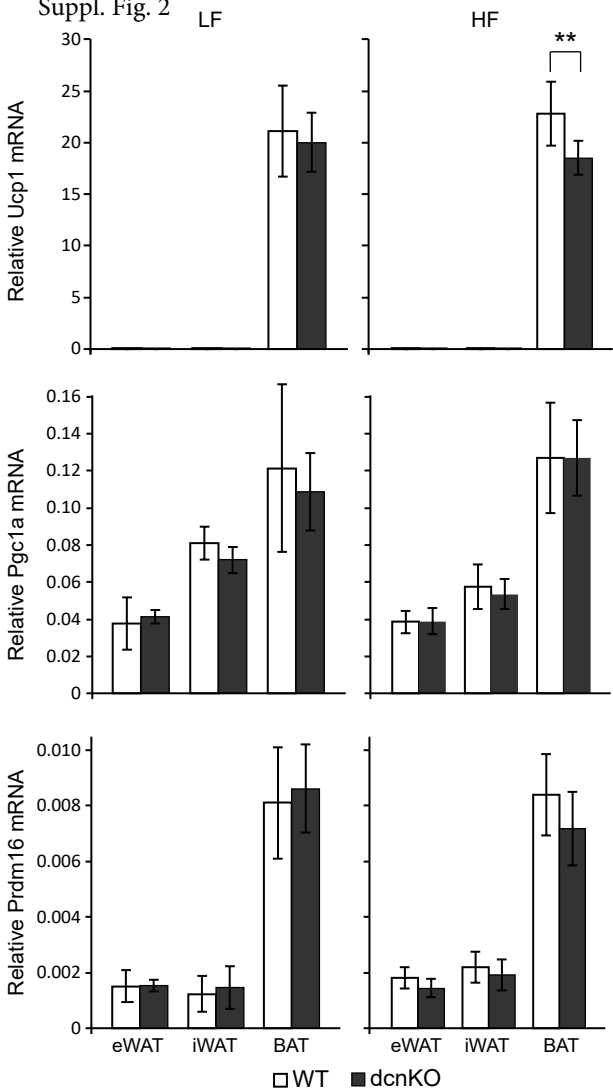

## Supplemental Figure Legends

**Supplemental Figure 1. Gene expression of glucose transporters and protein levels of Akt pathway.** *Glut4* mRNA in adipose tissue and skeletal muscle was measured by qPCR (A), *Glut1* mRNA in adipose tissue, skeletal muscle and liver was measured by qPCR (B) and *Glut2* mRNA in liver was measured by qPCR, all calculated relative to the reference gene *Rps13* (C). Protein levels of Akt pathway in iWAT and eWAT from WT and *Dcn*KO mice fed LF or HF diet.

**Supplemental Figure 2. Adipose tissue expression of Ucp1, Pgc1a and Prdm16.** mRNA expression levels of *Ucp1*, *Pgc1a* and *Prdm16* in different adipose tissues were measured by qPCR and calculated relative to the reference gene *Rps13*. iWAT, inguinal white adipose tissue; eWAT, epididymal white adipose tissue; BAT, interscapular brown adipose tissue. \*, p-value < 0.05; \*\*, p-value < 0.01;
